# Supplementary material for: Architecture of Solution for Panoramic Image Blurring in GIS projects Application
Source: Copernicus journal article supplement (doi:10.5194/gi-2021-23), 2021-07-20
Supplement: Supplementary file [file gi-2021-23-AC2-supplement.pdf]

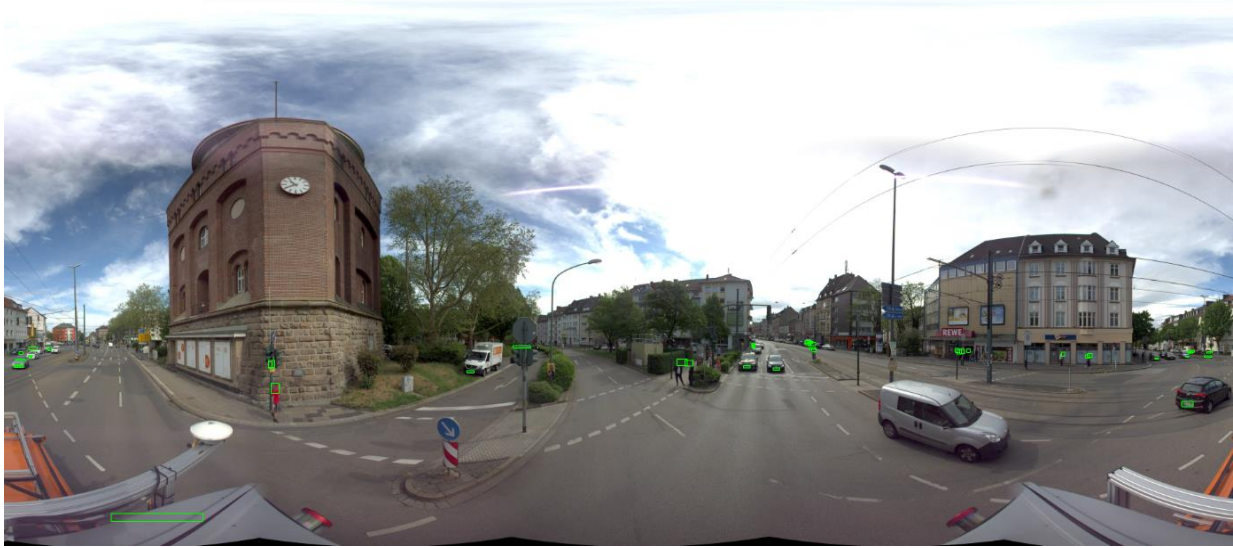

Fig 1. Example of 20+ objects detected in one image
